# Supplementary material for: Thermodynamic predicting and atomistic modeling the favored compositions for Mg–Ni–Y metallic glasses
Source: Royal Society of Chemistry journal article supplement (doi:10.1039/c5ra09313a), 2015-01-01
Supplement: c5ra09313a1.pdf [file c5ra09313a1.pdf]

**Electronic Supplementary Information**

**Thermodynamic Predicting and Atomistic Modeling the  
Favored Compositions for Mg-Ni-Y Metallic Glasses**

Q. Wang, J. H. Li, and B. X. Liu\*

*Key Laboratory of Advanced Materials (MOE), School of Materials Science and Engineering*

*Tsinghua University, Beijing 100084, CHINA*

*Corresponding author e-mail address: [dmslhx@tsinghua.edu.cn](mailto:dmslhx@tsinghua.edu.cn)*

---

## Tables

**TABLE S1** Lattice constants ( $a$  and  $c$ ), cohesion energies ( $E_c$ ), elastic constants ( $C_{ij}$ ), and bulk moduli ( $B_0$ ) of Mg, Ni, and Y that are fitted by potential and obtained from experiments. Lattice constants  $a$  and  $c$  are expressed in Å, cohesion energies  $E_c$  in eV/atom, elastic constants  $C_{ij}$  and bulk moduli  $B_0$  in Mbar.

|          | <i>hcp</i> -Mg |                    | <i>fcc</i> -Ni |                    | <i>hcp</i> -Y |                    |
|----------|----------------|--------------------|----------------|--------------------|---------------|--------------------|
|          | Fitted         | Exp.               | Fitted         | Exp.               | Fitted        | Exp.               |
| $a$      | 3.209          | 3.209 <sup>a</sup> | 3.524          | 3.517 <sup>a</sup> | 3.650         | 3.648 <sup>a</sup> |
| $c$      | 5.235          | 5.211 <sup>a</sup> |                |                    | 5.958         | 5.732 <sup>a</sup> |
| $E_c$    | 1.508          | 1.510 <sup>b</sup> | 4.423          | 4.440 <sup>b</sup> | 4.361         | 4.370 <sup>b</sup> |
| $C_{11}$ | 0.591          | 0.595 <sup>a</sup> | 2.385          | 2.418 <sup>a</sup> | 0.639         | 0.779 <sup>a</sup> |
| $C_{12}$ | 0.270          | 0.261 <sup>a</sup> | 1.630          | 1.550 <sup>a</sup> | 0.348         | 0.285 <sup>a</sup> |
| $C_{13}$ | 0.223          | 0.218 <sup>a</sup> |                |                    | 0.294         | 0.210 <sup>a</sup> |
| $C_{33}$ | 0.642          | 0.616 <sup>a</sup> |                |                    | 0.703         | 0.769 <sup>a</sup> |
| $C_{44}$ | 0.112          | 0.164 <sup>a</sup> | 1.217          | 1.242 <sup>a</sup> | 0.108         | 0.243 <sup>a</sup> |
| $B_0$    | 0.362          | 0.354 <sup>a</sup> | 1.882          | 1.860 <sup>a</sup> | 0.428         | 0.415 <sup>a</sup> |

<sup>a</sup>Ref. 1; <sup>b</sup>Ref. 2

**TABLE S2** Lattice constants ( $a$ ,  $b$ , and  $c$ ), cohesive energies ( $E_c$ ), and bulk moduli ( $B_0$ ) of the Mg-Ni,<sup>3</sup> Mg-Y<sup>4</sup> and Ni-Y compounds that are reproduced from the potential (first line) and derived from *ab initio* calculations (second line), together with some available experimental data for lattice constants of compounds (Ref. 5-8). Lattice constants  $a$ ,  $b$  and  $c$  are expressed in Å, cohesive energies  $E_c$  in eV/atom, and bulk moduli  $B_0$  in Mbar.

| Compounds               | Mg <sub>3</sub> Ni | MgNi         | MgNi <sub>3</sub> | MgNi <sub>3</sub> | Mg <sub>24</sub> Y <sub>5</sub> | Mg <sub>3</sub> Y | Mg <sub>2</sub> Y        | MgY <sub>3</sub> | Ni <sub>3</sub> Y | Ni <sub>2</sub> Y  | NiY <sub>3</sub> | NiY <sub>3</sub>               |
|-------------------------|--------------------|--------------|-------------------|-------------------|---------------------------------|-------------------|--------------------------|------------------|-------------------|--------------------|------------------|--------------------------------|
| Space group             | $F4\bar{3}m$       | $F4\bar{3}m$ | $F4\bar{3}m$      | $F4\bar{3}m$      | $I4\bar{3}m$                    | $Pm\bar{3}m$      | $P6\bar{3}/mmc$          | $Pm\bar{3}m$     | $Pm\bar{3}m$      | $Fd\bar{3}m$       | $Pm\bar{3}m$     | $Pnma$                         |
| $a$ or $a,c$ or $a,b,c$ | 6.673              | 3.120        | 3.724             | 5.930             | 11.02                           | 4.535             | 6.107, 6.107,9.885       | 5.011            | 3.903             | 7.250              | 3.456            | 7.308,9.427,6.375              |
|                         | 6.562              | 3.056        | 3.658             | 5.817             | 11.30                           | 4.674             | 6.065, 6.065,9.878       | 4.973            | 3.967             | 7.310              | 3.517            | 7.053,9.704,6.461              |
|                         |                    |              |                   |                   | 11.26 <sup>a</sup>              |                   | 6.038,9.800 <sup>b</sup> |                  |                   | 7.181 <sup>c</sup> |                  | 6.920,9.490,6.360 <sup>d</sup> |
| $E_c$                   | 2.277              | 3.161        | 3.816             | 3.781             | 2.060                           | 2.329             | 2.533                    | 3.637            | 4.507             | 4.695              | 4.288            | 4.439                          |
|                         | 2.277              | 3.161        | 3.819             | 3.782             | 2.063                           | 2.309             | 2.555                    | 3.628            | 4.498             | 4.788              | 4.203            | 4.581                          |
| $B_0$                   | 0.609              | 1.078        | 1.506             | 1.424             | 0.386                           | 0.281             | 0.374                    | 0.329            | 0.962             | 1.320              | 0.500            | 0.546                          |
|                         | 0.594              | 0.889        | 1.367             | 1.366             | 0.425                           | 0.316             | 0.436                    | 0.376            | 3.903             | 7.250              | 3.456            | 0.788                          |

<sup>a</sup>Ref. 5; <sup>b</sup>Ref. 6; <sup>c</sup>Ref. 7; <sup>d</sup>Ref. 8

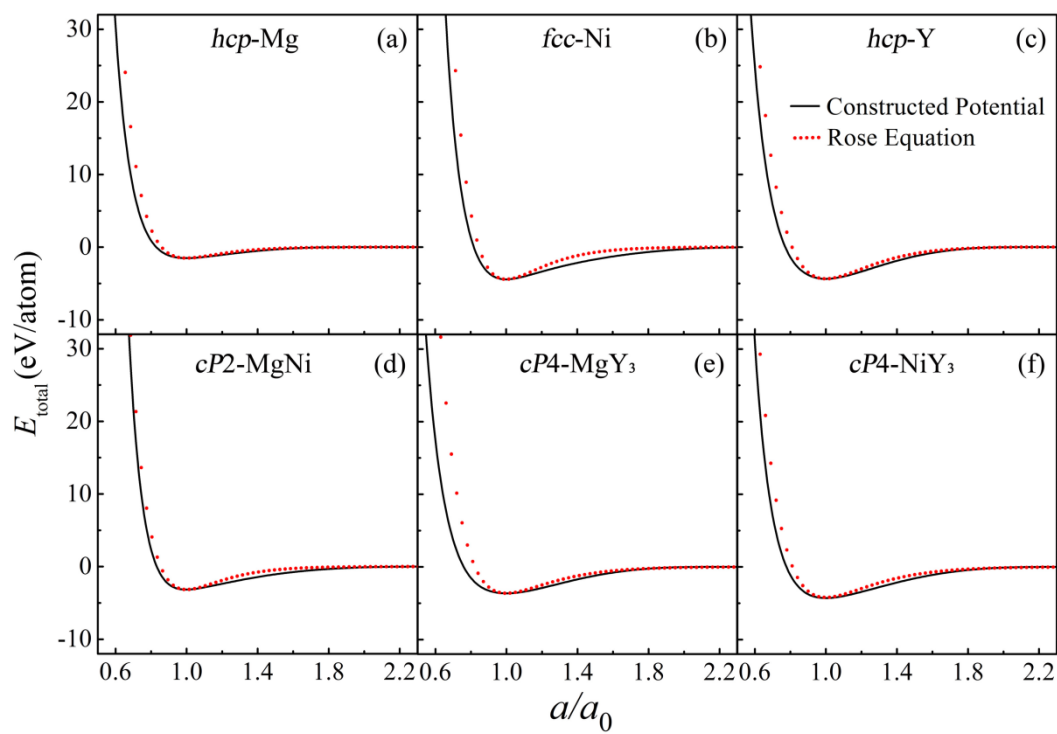

**Figure S1** Equations of state calculated from the constructed potential (solid lines) and Rose equation (dotted lines) for (a) *hcp*-Mg, (b) *fcc*-Ni, (d) *hcp*-Y, (d) *cP2*-MgNi, (e) *cP4*-MgY<sub>3</sub>, and (f) *cP4*-NiY<sub>3</sub>.

## References

- 1 D. R. Lide and T. J. Bruno, *CRC handbook of chemistry and physics*, CRC Press LLC, New York, 2012.
- 2 C. Kittel and P. McEuen, *Introduction to solid state physics*, Wiley, New York, 1996.
- 3 Q. Wang, J. H. Li, J. B. Liu and B. X. Liu, *Phys. Chem. Chem. Phys.*, 2014, **16**, 19590-19601.
- 4 Q. Wang, J. H. Li and B. X. Liu, *Phys. Chem. Chem. Phys.*, 2015, **17**, 14879-14889.
- 5 E. Gibson and O. Carlson, *Trans. ASM*, 1960, **52**, 1084.
- 6 K. H. J. Buschow, R. C. Sherwood, F. S. L. Hsu and K. Knorr, *J. Appl. Phys.*, 1978, **49**, 1510-1512.
- 7 B. J. Beaudry, J. F. Haefling and A. H. Daane, *Acta Crystallogr.*, 1960, **13**, 743-744.
- 8 R. Lemaire and D. Paccard, *Bulletin de la société française de minéralogie et de cristallographie*, 1967, **90**, 311–315.
